# Supplementary material
Source: Springer Nature journal article supplement (https://www.springermedizin.de/resource/supplementary/12885_2011_2985_MOESM4_ESM.pdf/9462474)

Fluorescence

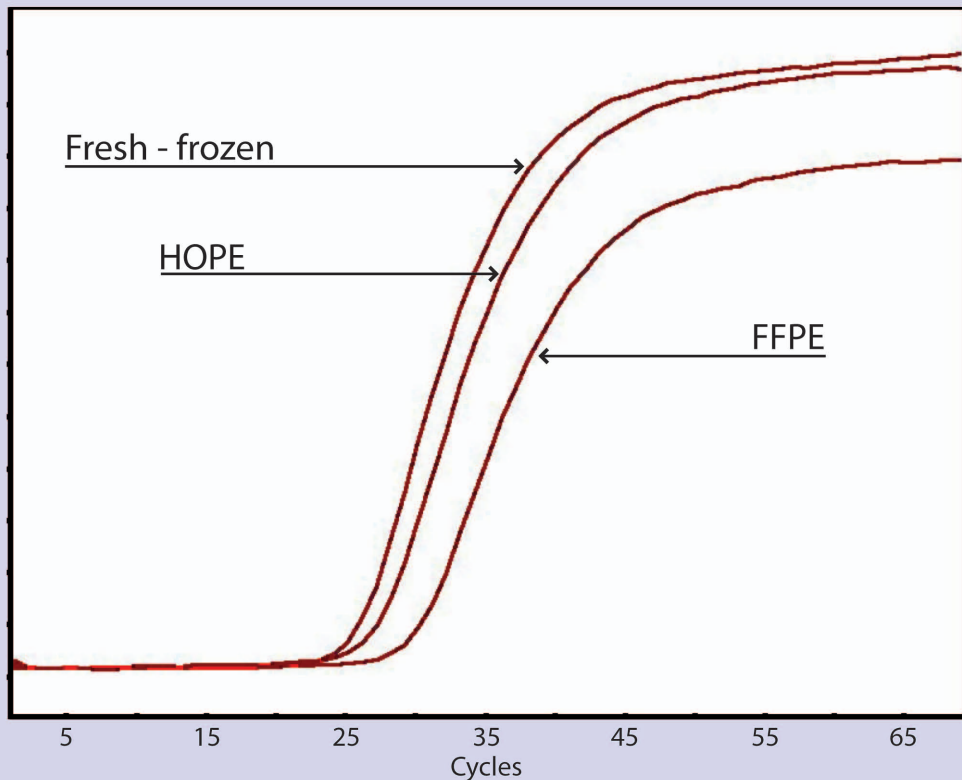

Supplement: MOESM4 [file 9462474]
